# Supplementary material for: Perfluoro-1-butanesulfonic acid etching strategy for dendrite suppression in aqueous zinc metal batteries
Source: Royal Society of Chemistry journal article supplement (doi:10.1039/d4ra03632h), 2024-01-01
Supplement: d4ra03632h1.pdf [file d4ra03632h1.pdf]

## Supporting Information

### **Perfluoro-1-butanesulfonic Acid Etching Strategy for Dendrite Suppression in Aqueous Zinc Metal Batteries**

Wanhao Chen<sup>a</sup>, Changhao Zhu<sup>b</sup>, Xinnan Xu<sup>b</sup>, Xuejun Liu<sup>\*a</sup>

<sup>a</sup> College of Chemistry and Chemical Engineering, State Key Laboratory of Bio-fibers and Eco-textiles, Qingdao University, Qingdao 266071, China

<sup>b</sup> School of Chemistry and Chemical Engineering, Nantong University, Nantong 226019, China

<sup>†</sup> The authors contributed equally to this work.

E-mails: xjliu@qdu.edu.cn (X. Liu);

## EXPERIMENTAL SECTION

**Materials.** Commercial Zn foil (0.1 mm) and Cu foil (0.1 mm) were purchased from Ailian of Tianjin, Ltd.  $\text{ZnSO}_4 \cdot 7\text{H}_2\text{O}$  (>99.0%), and Perfluoro-1-butanesulfonic acid (PFBS) (>99.0%) of analytic grade were purchased from the Aladdin and used as received without further purification. Commercial separator GF-A (1.6  $\mu\text{m}$ ) was purchased from Whatman of England.

**Preparation of the Zn@PFBS.** The 10 mm  $\times$  30 mm  $\times$  2 mm zinc foil were ultrasonically cleaned with acetone, anhydrous ethanol, and deionized water using 2000# sandpaper, followed by immersion in an aqueous solution of 10% perfluoro-1-butanesulfonic acid by mass fraction for 0.5 h, 3 h, and 18 h. The surfaces were cleaned with deionized water. After the treatment, the  $\text{C}_4\text{F}_9\text{O}_3\text{S-Zn}$  (Zn@PFBS) surfaces with hydrophobic properties were prepared by standing at room temperature for one day.

**Preparation of the  $\text{Na}_5\text{V}_{12}\text{O}_{32}$  (NVO) anode.** In the experimental section, we describe the synthesis of the NVO precursor. Firstly, 1.819 g  $\text{V}_2\text{O}_5$ , 40 mL  $\text{H}_2\text{O}$  and 2 mL NaOH ( $\text{pH} \approx 10$ ) were added in a beaker and then magnetically stirred for 15 min until a wine-red solution was formed. After that, the above solution was transfer to a 50 mL autoclave and kept at 180  $^\circ\text{C}$  for 48 hours. The precursors were collected by centrifugation and washed with deionized water and ethanol for 3 times, respectively, and dried at 80  $^\circ\text{C}$  in vacuum for 12 h. The NVO powders were obtained by heating the precursors at 300  $^\circ\text{C}$  in the air for 2 hours.

**Electrochemical Measurements.** Linear scanning voltammetry (LSV), Tafel plot, CV and Electrochemical Impedance Spectroscopy (EIS) tests are performed on a CHI760E electrochemical workstation. The LSV was tested using a Zn@ PFBS batteries with a scan rate of 1  $\text{mV s}^{-1}$ . The Tafel plot test used a three-electrode system (Working electrode: Zn, Counter electrode: Pt, Reference electrode: Ag/AgCl, Salt bridge: Saturated KCl solution) with a scan rate of 1  $\text{mV s}^{-1}$ . The electrochemical performances of Zn//Zn half-batteries, and Zn//NVO full batteries were tested in the form of encapsulated coin batteries (CR2032) in air and at room temperature. Testing of

batteries for galvanostatic charge/discharge cycles is performed on the Neware battery testing system. The Zn//Zn symmetric batteries were cycled with different current densities and capacities. For full Zn//NVO batteries, NVO cathode loading is 1-2 mg cm<sup>-2</sup>. The scan rate for CV testing of Zn//NVO full batteries is 1 mV s<sup>-1</sup>. Zn//NVO full batteries were cycled in the voltage range of 0.4-1.4 V.

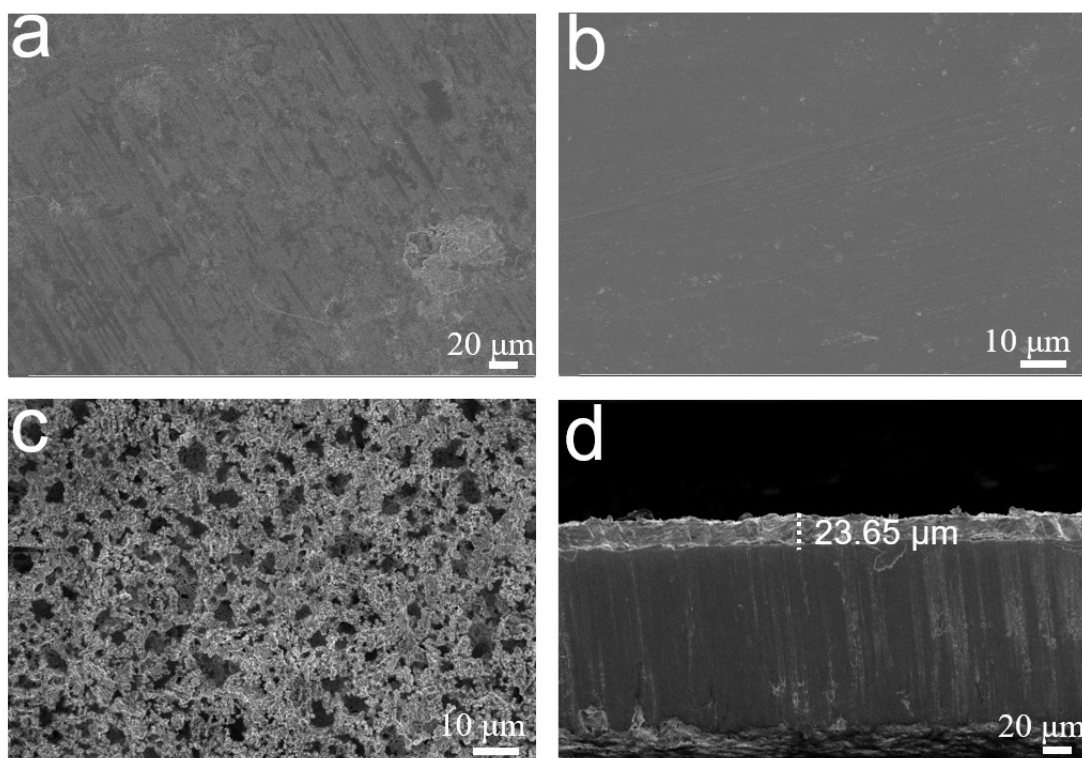

**Fig. S1** SEM images (a, b) Images of the bare zinc sheet (c) Surface of the zinc sheet after PFBS etching (d) Interface layer thickness.

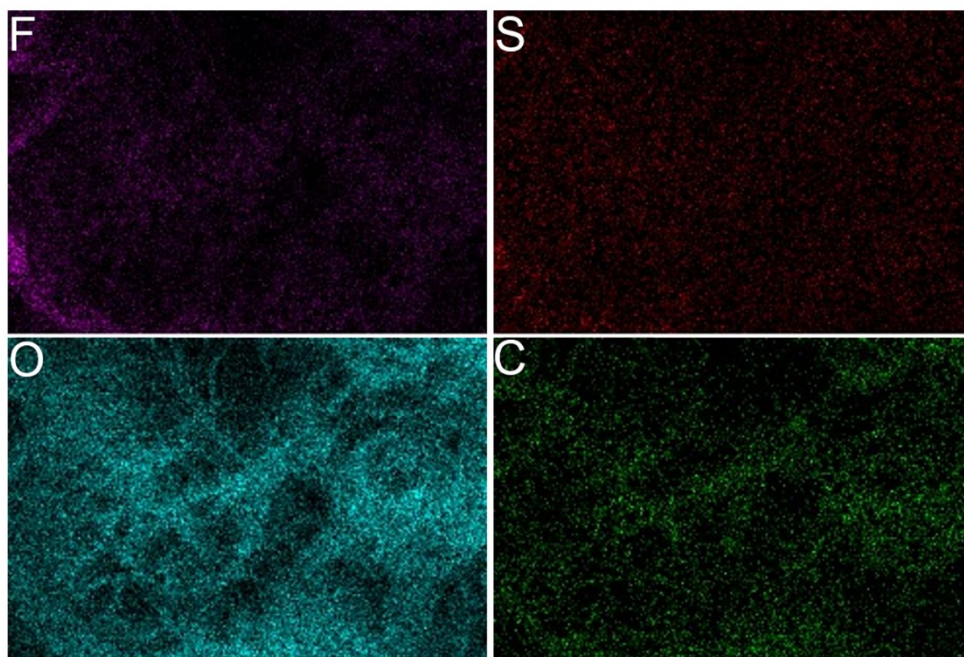

**Fig. S2** EDS spectrum of the Zn@PFBS interface layer.

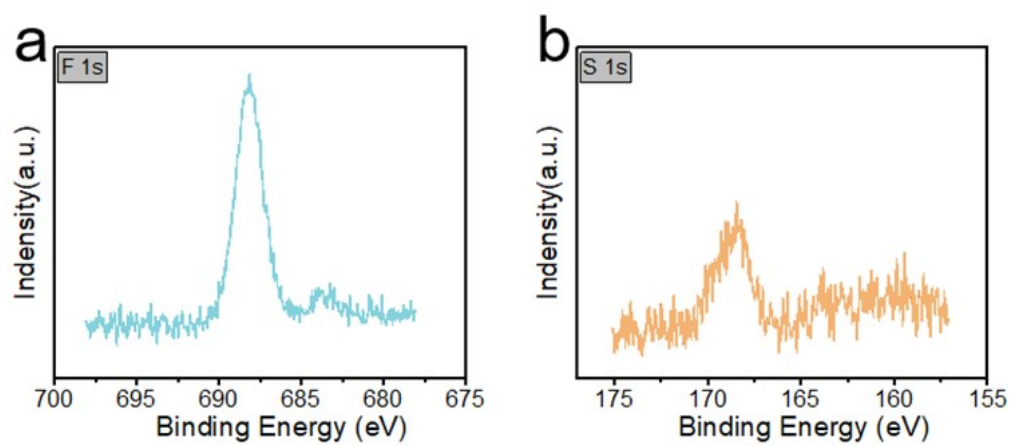

**Fig. S3** XPS spectra of the Zn@PFBS interface layer (a) F 1s; (b) S 1s.

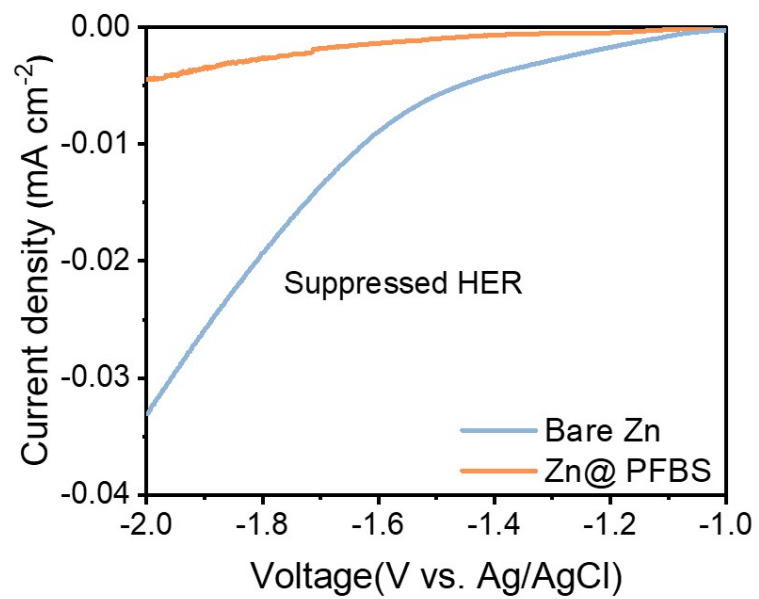

**Fig. S4** Linear polarization curve of a 2 M Zn<sub>2</sub>SO<sub>4</sub> solution.

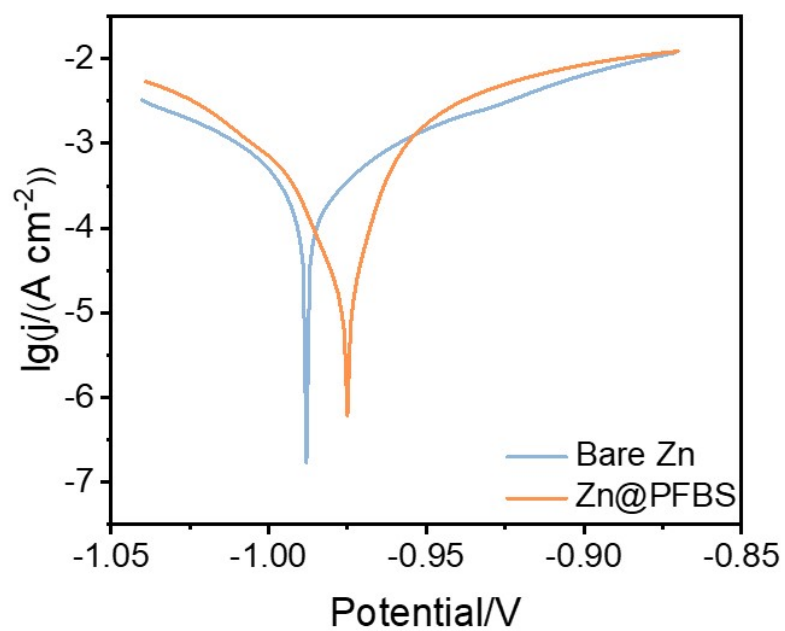

**Fig. S5** Tafel of the 2 M  $\text{ZnSO}_4$  electrolyte with different anode surfaces.

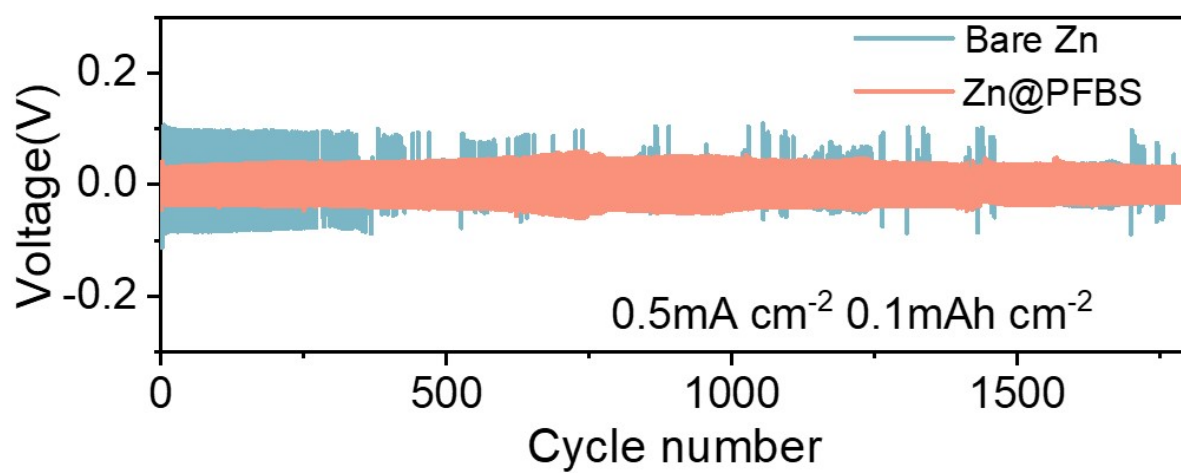

**Fig. S6** Long-term cycling performance of symmetric Zn//Zn and Zn@PFBS half-cells at 0.5 mA cm<sup>-2</sup>-0.1 mA h cm<sup>-2</sup>.

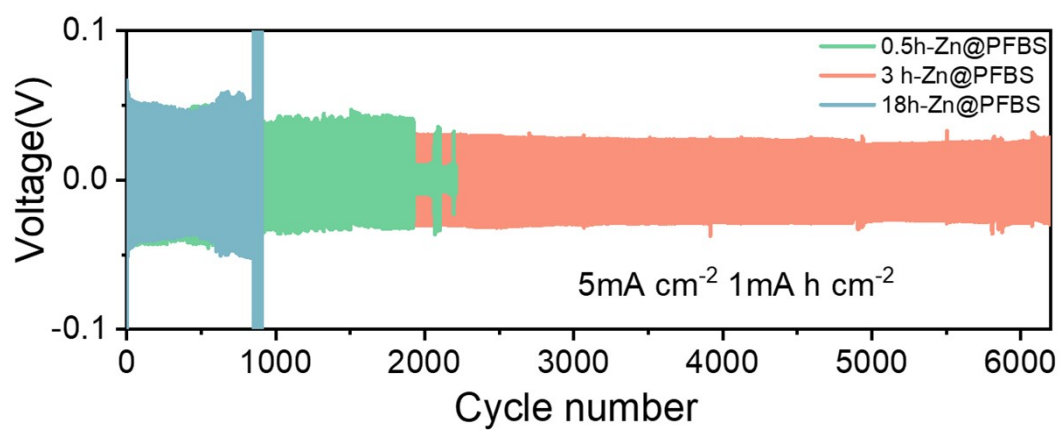

**Fig. S7** Long-term cycling performance of Zn@PFBS half-cells at 5 mA cm<sup>-2</sup>-1 mA h cm<sup>-2</sup> with different etching durations.

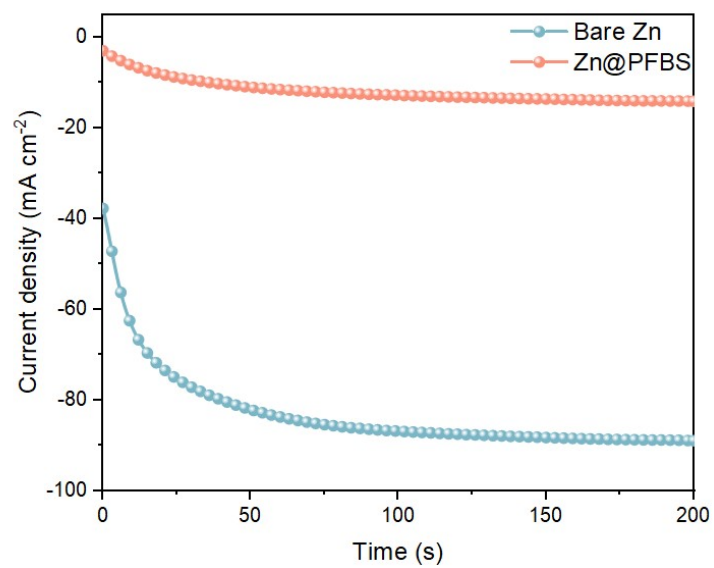

**Fig. S8** CA profiles of Zn//Cu and Zn@PFBS //Cu foil half cells under a voltage of  $-150\text{ mV}$ .

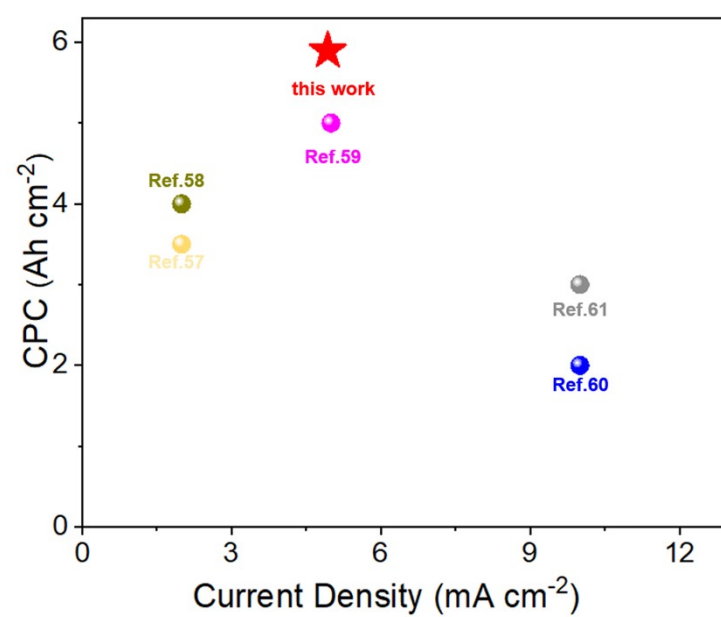

**Fig. S9** CPC comparison of the Zn symmetric cell using Zn@PFBS electrode with other reported literature studies.

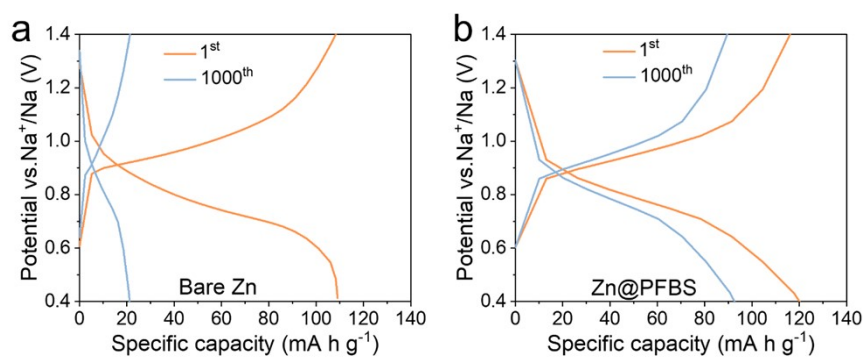

**Fig. S10** Charge-discharge curves for different numbers of cycles (a) Bare zinc anode; (b) Zn@PFBS anode after etching.
